# Supplementary material
Source: PubMed Central journal article supplement (PMC5698063)
Supplement: ASN.2016111222SupplementaryData.pdf [file ASN.2016111222SupplementaryData.pdf]

1 **Supplemental Methods**

2 **Supplemental Table**

- 3 • **Supplemental Table 1: List of primers used for qRT-PCR.**

4 **Supplemental Figures**

- 5 • **Supplemental Figure 1: PLD4 expression also increases after CCl<sub>4</sub>-induced liver**  
6 **fibrosis in mice.**
- 7 • **Supplemental Figure 2: Characterization of PLD4<sup>-/-</sup> mice.**
- 8 • **Supplemental Figure 3: PLD4<sup>-/-</sup> mice depict decreased expression of fibrotic**  
9 **markers at mRNA and protein levels than the PLD4<sup>+/+</sup> mice.**
- 10 • **Supplemental Figure 4: RNA sequencing identifies differentially expressed genes**  
11 **between the PLD4<sup>+/+</sup> and PLD4<sup>-/-</sup> mice.**
- 12 • **Supplemental Figure 5: PLD4<sup>-/-</sup> mice kidneys show differential expression of**  
13 **innate and adaptive immune components, decreased level of TGF-β signaling**  
14 **molecules and AAT as well as increased level of NE compared to the PLD4<sup>+/+</sup>**  
15 **mice.**
- 16 • **Supplemental Figure 6: PLD4-overexpressed HEK293T cells depict increased**  
17 **expression of AAT.**
- 18 • **Supplemental Figure 7. PLD4-mediated increased expression of TGF-β-induced**  
19 **fibrotic markers is decreased with NE treatment in HEK293T cells and primary**  
20 **human kidney fibroblasts co-culture system.**
- 21 • **Supplemental Figure 8: Treatment with PLD4 siRNA protects mice from kidney**  
22 **fibrosis.**

- 23
- **Supplemental Figure 9: Schematic illustration of the major steps involved in**
- 24 **interaction proteomics.**
- **Supplemental Figure 10. Interaction network of the confirmed binding partners of**
- 25 **PLD4 (CLGN, LMAN2 and SEL1L).**
- **Supplemental Figure 11. PLD4 inhibition down-regulates TrkA-mediated MAPK**
- 26 **signaling pathway.**
- 27
- 28
- 29
- 30
- 31
- 32
- 33
- 34
- 35
- 36
- 37
- 38
- 39
- 40
- 41
- 42
- 43
- 44
- 45
- 46
- 47

## 48 SUPPLEMENTAL METHODS

### 49 Animals

50 Kidney fibrosis was induced in mice by two mechanistically different methods-(1) FA-induced  
51 and (2) UUO-induced kidney fibrosis. Mice were injected with a single dose of 250 mg/kg FA in  
52 0.3 M sodium bicarbonate (vehicle), ip and sacrificed at days 1, 3, 7 and 14 post injection, and  
53 kidneys were collected. UUO in mice was performed under general anesthesia (50 mg/kg  
54 pentobarbital sodium, ip) by ligation of the left ureter as previously described.<sup>1</sup> Mice received  
55 lost fluid replacement (1 ml normal saline, sc, warmed at 37°C, immediately after surgery) as  
56 well as pain medication (buprenorphine, 0.05 mg/kg, sc, every 12 h for the first 2 days; 1<sup>st</sup> dose  
57 with the normal saline administered immediately after surgery and 3 additional doses in 50 µl  
58 normal saline). Mice were euthanized at days 3, 7 and 14 or 5 and 10 after UUO, and kidneys  
59 were collected.

60 In order to elucidate the role of proximal tubule specific PLD4 in kidney fibrogenesis, we  
61 bred the Cre and flox lines together for 2 generations and then selected breeders to produce  
62 the experimental genotypes PLD4<sup>wt/wt</sup>Cre<sup>+/-</sup> mice (control group) and PLD4<sup>fl/fl</sup>Cre<sup>+/-</sup> mice  
63 (proximal tubular cells-specific PLD4 knockout). For induction of the SLC34a1-driven Cre, mice  
64 were injected with 3 doses of 2mg tamoxifen (diluted in corn oil and 3% ethanol), every  
65 alternate day, *i.e.*, on day 1, 3 and 5 after FA injection. Mice were sacrificed on day 7 after FA  
66 injection (Figure 2D). Tamoxifen injections were started on day 1 after FA treatment, because  
67 our objective was to initiate PLD4 deletion after the induction of injury.

68 Liver fibrosis was induced in mice using carbon tetrachloride (CCl<sub>4</sub>). CCl<sub>4</sub> (10% at 10  
69 µl/g, ip) or its vehicle (corn oil) was administered twice a week for a total of 8 weeks. Mice were  
70 euthanized, and the liver was collected at 8 weeks post the initiation of CCl<sub>4</sub>/vehicle injection.

71 In order to assess the therapeutic potential of PLD4 siRNA, kidney fibrosis was induced  
72 in mice by injecting 250 mg/kg FA or vehicle, ip and subsequently treated with PLD4 siRNA or

73 scrambled siRNA (30µg/200µl, iv) in RNase-free phosphate-buffered saline (PBS) carriage  
74 medium at 2, 20, 38, 62 and 110 h after FA injection. Mice were sacrificed on day 7 after FA  
75 injection (Figure 4A). To assess injury markers, mice were sacrificed on day 2 after FA  
76 injection. Plasma creatinine was assessed by Isotope Dilution LC-MS MS at the O'Brien Core  
77 Center for Acute Kidney Injury Research (University of Alabama School of Medicine,  
78 Birmingham, Alabama, USA). Blood urea nitrogen (BUN) levels were measured in mice  
79 plasma using the Infinity Urea assay (Thermo Scientific) according to the manufacturer's  
80 instructions. KIM1 protein expression was assessed in mice kidneys using goat polyclonal anti-  
81 KIM1 antibody (R&D Systems, Inc., Minneapolis, MN).

82 De-identified human kidney tissue samples from patients with or without severe kidney  
83 fibrosis (n=10) were obtained from the Department of Pathology at Brigham and Women's  
84 Hospital. The Institutional Review Board approved the protocol for usage of paraffin embedded  
85 tissue sections from patients that underwent nephrectomy due to malignancies.

86

### 87 **Western blot analysis**

88 Western blot analysis was performed using standard protocols established in the laboratory.<sup>2</sup>  
89 Protein concentrations were determined using the BCA protein assay kit (Pierce, Thermo  
90 Scientific, MA), and equal amount of protein (25µg) was loaded and run on a polyacrylamide  
91 gel. The following primary antibodies were used for specific protein expression detection:  
92 rabbit polyclonal anti-PLD4 was purchased from MyBioSource, Inc., San Diego, CA. The  
93 antibody was raised against the immunogen sequence CLRQLFERDWSSRY, and the  
94 specificity was confirmed by running BLAST across different databases, lack of protein  
95 detection in the PLD4<sup>-/-</sup> mice at baseline and after fibrosis using Western blotting  
96 (Supplemental Figure 2D) as well as immunostaining (Supplemental Figure 2B), decrease of  
97 PLD4 expression in cells when transfected with PLD4 siRNA (Supplemental Figure 8A) and in

98 mice kidneys when injected with PLD4 siRNA (Figure 4B, Supplemental Figure 8C) and  
99 immunoprecipitation followed by immunoblotting using either anti-PLD4 antibody or anti-FLAG  
100 antibody (PLD4 plasmid was FLAG-tagged) (Figure 5E, Supplemental Figure 9B). Other  
101 primary antibodies used were rabbit polyclonal anti-fibronectin, mouse monoclonal anti-  
102 LMAN2, goat polyclonal anti-SEL1L and rabbit monoclonal anti-TrkA (Abcam, Cambridge,  
103 MA), mouse monoclonal anti-CLGN, rabbit polyclonal anti-collagen 1 $\alpha$ 1 and mouse  
104 monoclonal anti-FRS2 $\alpha$  (Novus Biologicals, Littleton, CO), mouse monoclonal anti- $\alpha$ -SMA  
105 (Sigma-Aldrich, St. Louis, MO), rabbit polyclonal anti-AAT and rabbit polyclonal anti-NE  
106 (Proteintech Group, Inc., Rosemont, IL), rabbit polyclonal anti-Smad2, rabbit polyclonal anti-  
107 pSmad2, rabbit polyclonal anti-Smad3, rabbit polyclonal anti-pSmad3, rabbit polyclonal anti-  
108 ERK, rabbit polyclonal anti-pERK (Cell Signaling Technology, Beverly, MA), goat polyclonal  
109 anti-KIM1 (R&D Systems, Inc., Minneapolis, MN) and rabbit polyclonal anti-GAPDH (Abcam,  
110 Cambridge, MA). Horseradish peroxidase-conjugated secondary antibodies against rabbit  
111 (Cell Signaling Technology, Beverly, MA), mouse (Cell Signaling Technology, Beverly, MA)  
112 and goat (Abcam, Cambridge, MA) were used to detect the appropriate primary antibody.  
113 Bands were detected using enhanced chemiluminescence and captured with Gel Doc™ XR+  
114 System (Bio-Rad, Hercules, CA). The blots were quantified with the help of Image Lab 4.1  
115 software (Bio-Rad, Hercules, CA) and normalized with GAPDH expression.

116

### 117 **Quantitative real-time PCR**

118 Total RNA from kidney tissue was isolated using TRIzol (Invitrogen, Grand Island, NY)  
119 according to manufacturer's protocol and reverse transcribed to cDNA using the QuantiTect  
120 Reverse Transcription Kit (Qiagen, Valencia, CA). Quantitative RT-PCR was performed using  
121 a QuantiFast SYBR Green PCR Kit (Qiagen, Valencia, CA) on a LifeTechnologies  
122 QuantStudio 7 RT-PCR instrument (LifeTechnologies, Carlsbad, CA) as previously described.<sup>3</sup>

123 GAPDH was used as an endogenous control for normalization. Primer pairs used are listed in  
124 Supplemental Table 1.

125

## 126 **Histology**

127 Mouse organs were formalin-fixed, dehydrated in 70% ethanol, paraffin-embedded, sectioned  
128 and H&E stained at the Dana-Farber/Harvard Cancer Center Pathology Core Facilities. Mouse  
129 kidneys were stained with Picrosirius Red or Masson's Trichrome, and liver was stained with  
130 Picrosirius Red to assess the collagen deposition. Immunofluorescence staining was  
131 performed as described previously.<sup>4</sup> Mouse kidneys were fixed in 4% paraformaldehyde and  
132 transferred to sucrose solution (30%) for cryoprotection following which the kidneys were  
133 frozen in Tissue-Tek O.C.T. (VWR, Radnor, PA). Five  $\mu$ m thick kidney sections were  
134 permeabilized, blocked and labeled with primary antibodies, including rabbit anti-PLD4  
135 (MyBioSource, Inc., San Diego, CA), FITC-conjugated anti- $\alpha$ SMA (Sigma-Aldrich, St. Louis,  
136 MO), Fluorescein labeled LTL and Fluorescein labeled DBA (Vector Labs, Burlingame, CA),  
137 rabbit polyclonal anti-fibronectin (Abcam, Cambridge, MA) and rabbit polyclonal anti-collagen  
138 1 $\alpha$ 1 (Novus Biologicals, Littleton, CO). Slides were subsequently stained with species-specific  
139 FITC- or Cy3-conjugated secondary antibodies (Jackson ImmunoResearch Laboratories, West  
140 Grove, PA) and mounted with 4,6-diamidino-2-phenylindole-containing ProLong Gold Anti-fade  
141 Mountant (Life Technologies, Grand Island, NY). The images were captured on a Carl Zeiss  
142 AxioImager.M2 using AxioVision SE64 software or on a Maeby Nikon A1R point scanning  
143 confocal with spectral detection and resonant scanner on an inverted Nikon Ti microscope.  
144 The images were analyzed through NIH ImageJ using a color threshold algorithm.

145

146

147

## 148 **Cell culture and transfections**

149 For PLD4 subcellular localization experiment, HeLa cells and HEK293 cells were fixed with 4%  
150 paraformaldehyde and 4% sucrose for 10 min, permeabilized with PBS 0.1% Triton X-100,  
151 blocked with PBS 1% BSA and incubated with rabbit polyclonal anti-PLD4 (MyBioSource, Inc.,  
152 San Diego, CA), mouse monoclonal anti-calnexin (Novus Biologicals, Littleton, CO), mouse  
153 polyclonal anti-golga1 (Abnova, Walnut, CA) and mouse monoclonal anti-Tom20 (Santa Cruz  
154 Biotechnology, Dallas, TX) overnight at 4°C. Slides were subsequently stained with species  
155 specific FITC- or Cy3-conjugated secondary antibodies (Jackson ImmunoResearch  
156 Laboratories, West Grove, PA) and mounted with 4,6-diamidino-2-phenylindole (DAPI)-  
157 containing ProLong Gold Anti-fade Mountant (Life Technologies, Grand Island, NY). The  
158 images were captured on a Carl Zeiss AxioImager.M2 using AxioVision SE64 software.

159 For PLD4 over-expression experiments, HEK293T cells were transfected with either  
160 pCMV Myc (pCMV) or PLD4 (Myc-DDK-tagged)-Human PLD4 (pCMV-PLD4) plasmids  
161 (Origene Technologies, Rockville, MD) using Lipofectamine 2000 (Life Technologies, Grand  
162 Island, NY) according to manufacturer's specifications. The cells were harvested 48h post-  
163 transfection for Western blot analysis.

164 Since PLD4 is not endogenously expressed in fibroblasts, a co-culture system was  
165 established using the primary human kidney fibroblasts (purchased from Cell Biologics,  
166 Chicago, IL) and HEK293T cells (transfected with pCMV or pCMV-PLD4) in order to examine  
167 the effect of PLD4 on TGF- $\beta$ -induced fibrotic markers. Further, the effect of NE on the  
168 expression of fibrotic markers was also assessed. The co-cultured cells were treated with  
169 TGF- $\beta$  (10ng/ml) and/or NE (50nM) for 48h, and the cells were harvested to measure the  
170 fibrotic markers. In another set of the experiment, cells were treated with NE (50nM) for 6h  
171 after the 48h treatment with TGF- $\beta$  (10ng/ml).

172 For PLD4 knock down experiments, mIMCD3 cells were transfected with 100nM  
173 scrambled or PLD4 siRNA (Dharmacon, Lafayette, CO) using siPORT NeoFX transfection  
174 reagent (Life Technologies, Grand Island, NY) following the manufacturers protocol. We tested  
175 the efficacy of 4 siRNAs and found one (target sequence: UCAUCGUGCCUGUGGGAAA) that  
176 resulted in a significant silencing of PLD4 *in vitro*, which was further selected for *in vivo*  
177 experiments. The cells were harvested 24h post-transfection for Western blot analysis.  
178 mIMCD3 cells were chosen for this experiment since these are mouse epithelial cells and the  
179 goal was to examine the effectiveness of siRNA when injected in mice *in vivo*.

180

181

182

183

184

185

186

187

188

189

190

191

192

193

194

195

196



| <b>Gene</b>                           | <b>Forward primer</b>    | <b>Reverse primer</b>    |
|---------------------------------------|--------------------------|--------------------------|
| <b>GAPDH</b>                          | GAATACGGCTACAGCAACAGG    | GGTCTGGGATGGAAATTGTG     |
| <b>PLD1</b>                           | CTTTCGTTGACTGAAGGCTCA    | GACGTGTTCCACCCTGGTCTC    |
| <b>PLD2</b>                           | TGAGTTTGC GGAAGCACTGT    | GCATTGTTCTCCGCTGTTTC     |
| <b>PLD3</b>                           | GGAGTTCTCTCATCCACGCA     | CACTTTGACGCCTCGTTCAT     |
| <b>PLD4</b>                           | ATTCTGGGTTGTGGATGGG      | CAAGGTCTTGAGCCAGGTTG     |
| <b><math>\alpha</math>SMA</b>         | GTCCCAGACATCAGGGAGTAA    | TCGGATACTTCAGCGTCAGGA    |
| <b>Fibronectin</b>                    | ATGTGGACCCCTCCTGATAGT    | GCCCAGTGATTTCCAGCAAAGG   |
| <b>Collagen 1<math>\alpha</math>1</b> | TGACTGGAAGAGCGGAGAGT     | GTTCCGGGCTGATGTACCAGT    |
| <b>IFN-<math>\gamma</math></b>        | GTCCTGAGACAATGAACGCT     | AAAGAGATAATCTGGCTCTGC    |
| <b>IL-1<math>\beta</math></b>         | ACCTGTCCTGTGTAATGAAAGACG | TGGGTATTGCTTGGGATC       |
| <b>IL-17</b>                          | ACTACCTCAACCGTTCCACG     | CTTCCCAGATCACAGAGGGA     |
| <b>IL-4</b>                           | TCGGCATT TTTGAACGAGGTC   | GAAAAGCCCGAAAGAGTCTC     |
| <b>TNF-<math>\alpha</math></b>        | CGCTCTTCTGTCTACTGAACTT   | GATGAGAGGGAGGCCATT       |
| <b>IL-6</b>                           | CAAGAGACTTCCATCCAGTTGCC  | CATTTCCACGATTTCCCAGAGAAC |
| <b>IL-10</b>                          | CAGCCTTGCAGAAAAGAGAG     | GGAAGTGGGTGCAGTTATTG     |
| <b>IL-2</b>                           | AGGAACCTGAAACTCCCCAG     | GTCAAATCCAGAACATGCCG     |
| <b>IL-12</b>                          | GTGTCTTAGCCAGTCCCGAA     | TCATGATCGATGTCTTCAGCA    |
| <b>IL-23</b>                          | TCCCTACTAGGACTCAGCCAACTC | ACTCAGGCTGGGCACTG        |
| <b>iNOS</b>                           | CGTGAAGAAAACCCCTTGTG     | GGAGCCATTTTGGTGACTCTT    |
| <b>Arg1</b>                           | CAGAGGTCCAGAAGAATGGAAG   | AGCATCCACCCAAATGACAC     |

198

199

200

201

202

203

204

205

206

207

208

209

210

SUPPLEMENTAL FIGURES

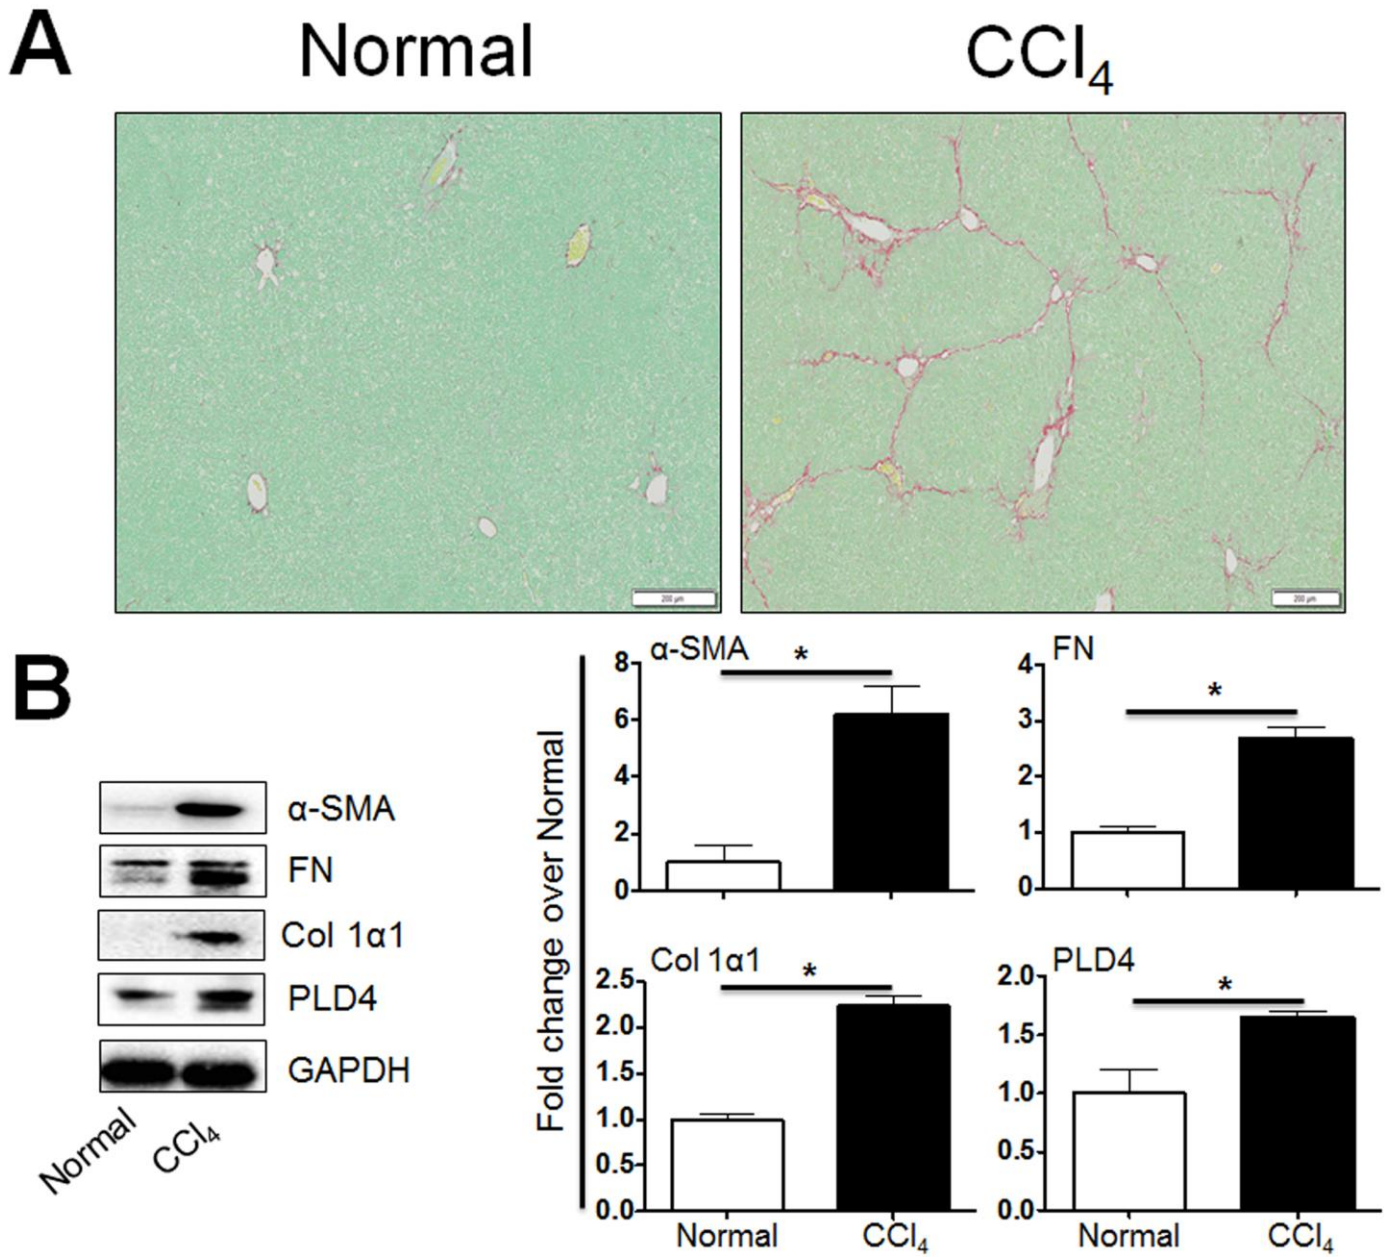

218 **Supplemental Figure 1.** PLD4 expression also increases after CCl<sub>4</sub>-induced liver fibrosis in  
219 mice. (A) Representative photomicrographs of Picrosirius Red staining depicting collagen  
220 deposition in mice liver at baseline and following fibrosis. Scale bars, 200µm. (B) Protein  
221 expression of the fibrotic markers- α-SMA, fibronectin (FN) and collagen 1α1 (Col 1α1); and  
222 PLD4 in the liver of mice. Data were normalized to GAPDH and are presented as mean ± SEM  
223 (n = 4-10/group) of the fold change over Normal. \**P*<0.05.

224

225

226

227

228

229

230

231

232

233

234

235

236

237

238

239

240

241

242

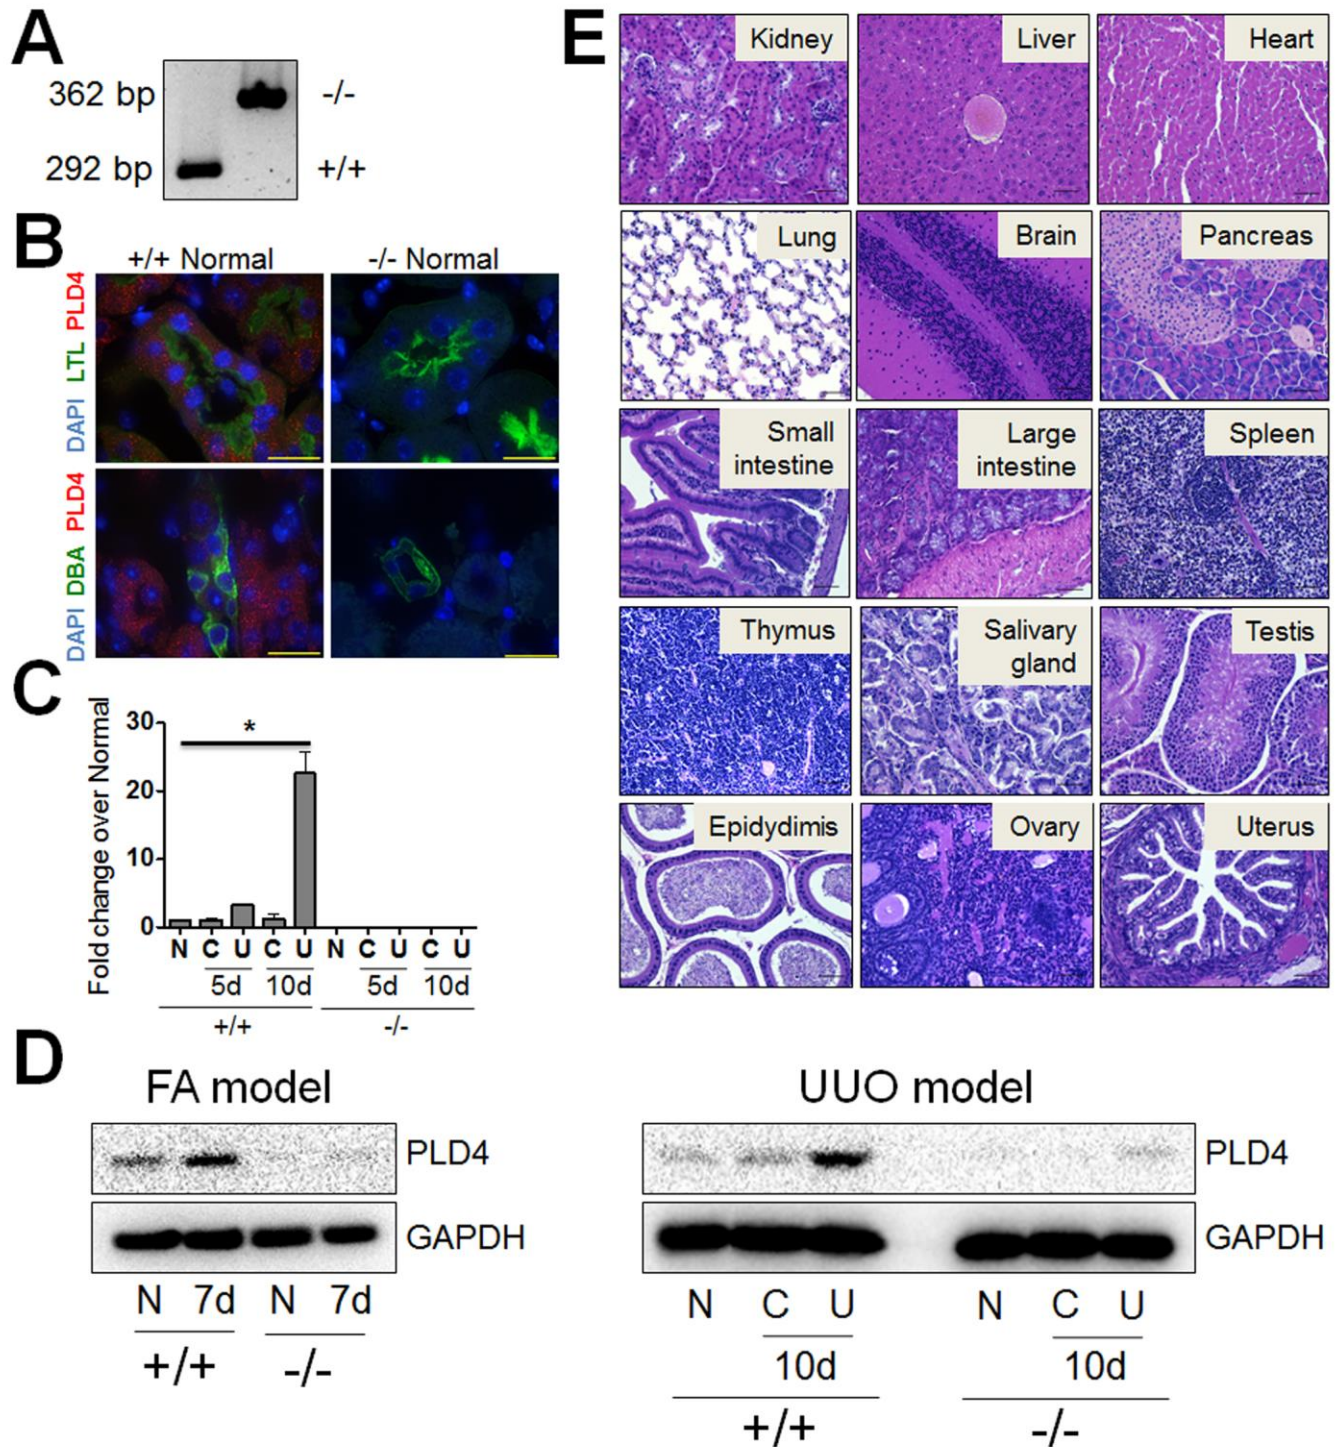

247 marker) and Dolichos biflorus agglutinin (DBA, distal tubule marker) in PLD4<sup>+/+</sup> and PLD4<sup>-/-</sup>  
248 mice kidneys at baseline. Scale bars, 20 $\mu$ m. (C) qRT-PCR using PLD4 forward and reverse  
249 primers in PLD4<sup>+/+</sup> and PLD4<sup>-/-</sup> mice kidneys at baseline and following fibrosis. Data were  
250 normalized to GAPDH and are presented as mean  $\pm$  SEM (n = 5/group) of the fold change  
251 over PLD4<sup>+/+</sup> Normal (N). \**P*<0.05. (D) Western blot analysis using anti-PLD4 antibody in the  
252 PLD4<sup>+/+</sup> and PLD4<sup>-/-</sup> mice at baseline and following fibrosis. (E) Representative images of  
253 histology after H&E staining of major organs in PLD4<sup>-/-</sup> mice at baseline (n = 5 males, 5  
254 females). Scale bars, 50  $\mu$ m. N-Normal, C-Contralateral, U-UUO.

255

256

257

258

259

260

261

262

263

264

265

266

267

268

269

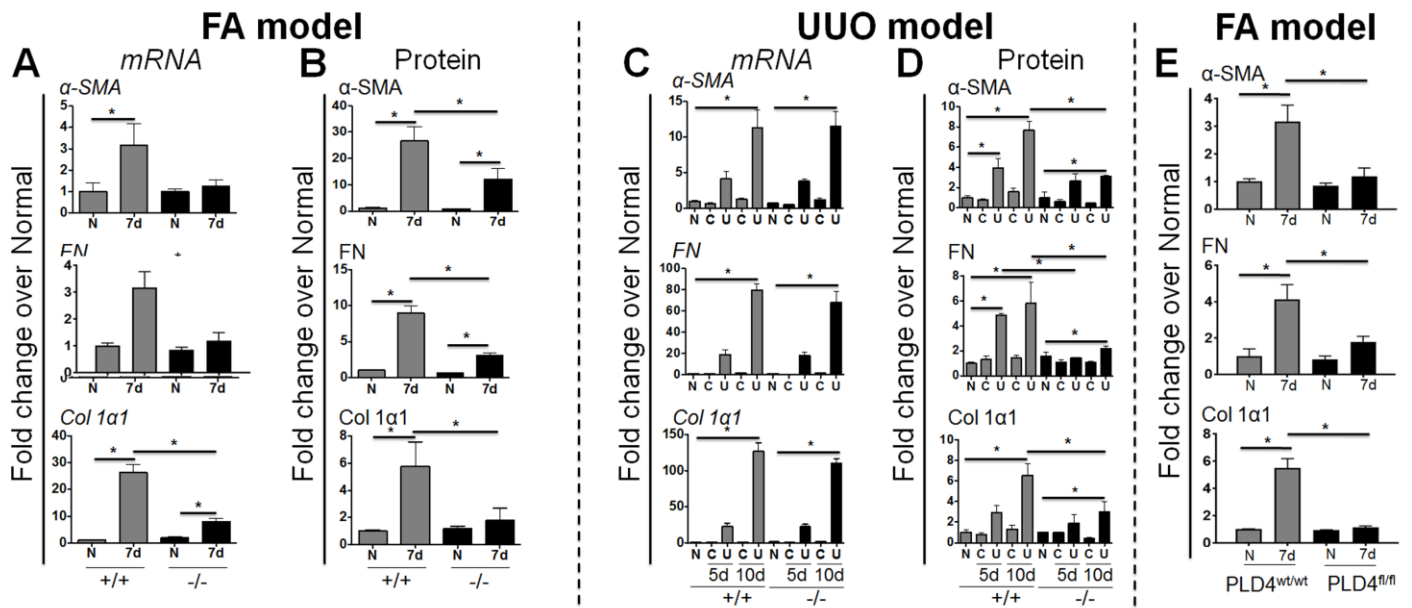

270

271

272 **Supplemental Figure 3.** PLD4<sup>-/-</sup> mice depict decreased expression of fibrotic markers at  
 273 mRNA and protein levels than the PLD4<sup>+/+</sup> mice. Quantification of the fibrotic markers- $\alpha$ -SMA,  
 274 fibronectin (FN) and collagen 1 $\alpha$ 1 (Col 1 $\alpha$ 1) at both (A, C) mRNA and (B, D) protein levels in  
 275 the kidneys of mice treated with FA and subjected to UUO, respectively. Data were normalized  
 276 to GAPDH and are presented as mean  $\pm$  SEM (n = 5-7/group) of the fold change over PLD4<sup>+/+</sup>  
 277 Normal (N). \*P<0.05. N-Normal, C-Contralateral, U-UUO. (E) Quantification of the protein  
 278 expression of  $\alpha$ -SMA, fibronectin (FN) and collagen 1 $\alpha$ 1 (Col 1 $\alpha$ 1) in the kidneys of  
 279 SLC34a1<sup>GCE/+</sup> PLD4<sup>wt/wt</sup> and SLC34a1<sup>GCE/+</sup> PLD4<sup>fl/fl</sup> mice treated with FA. Data were  
 280 normalized to GAPDH and are presented as mean  $\pm$  SEM (n = 5/group) of the fold change  
 281 over Normal. \*P<0.05.

282

283

284

285

286

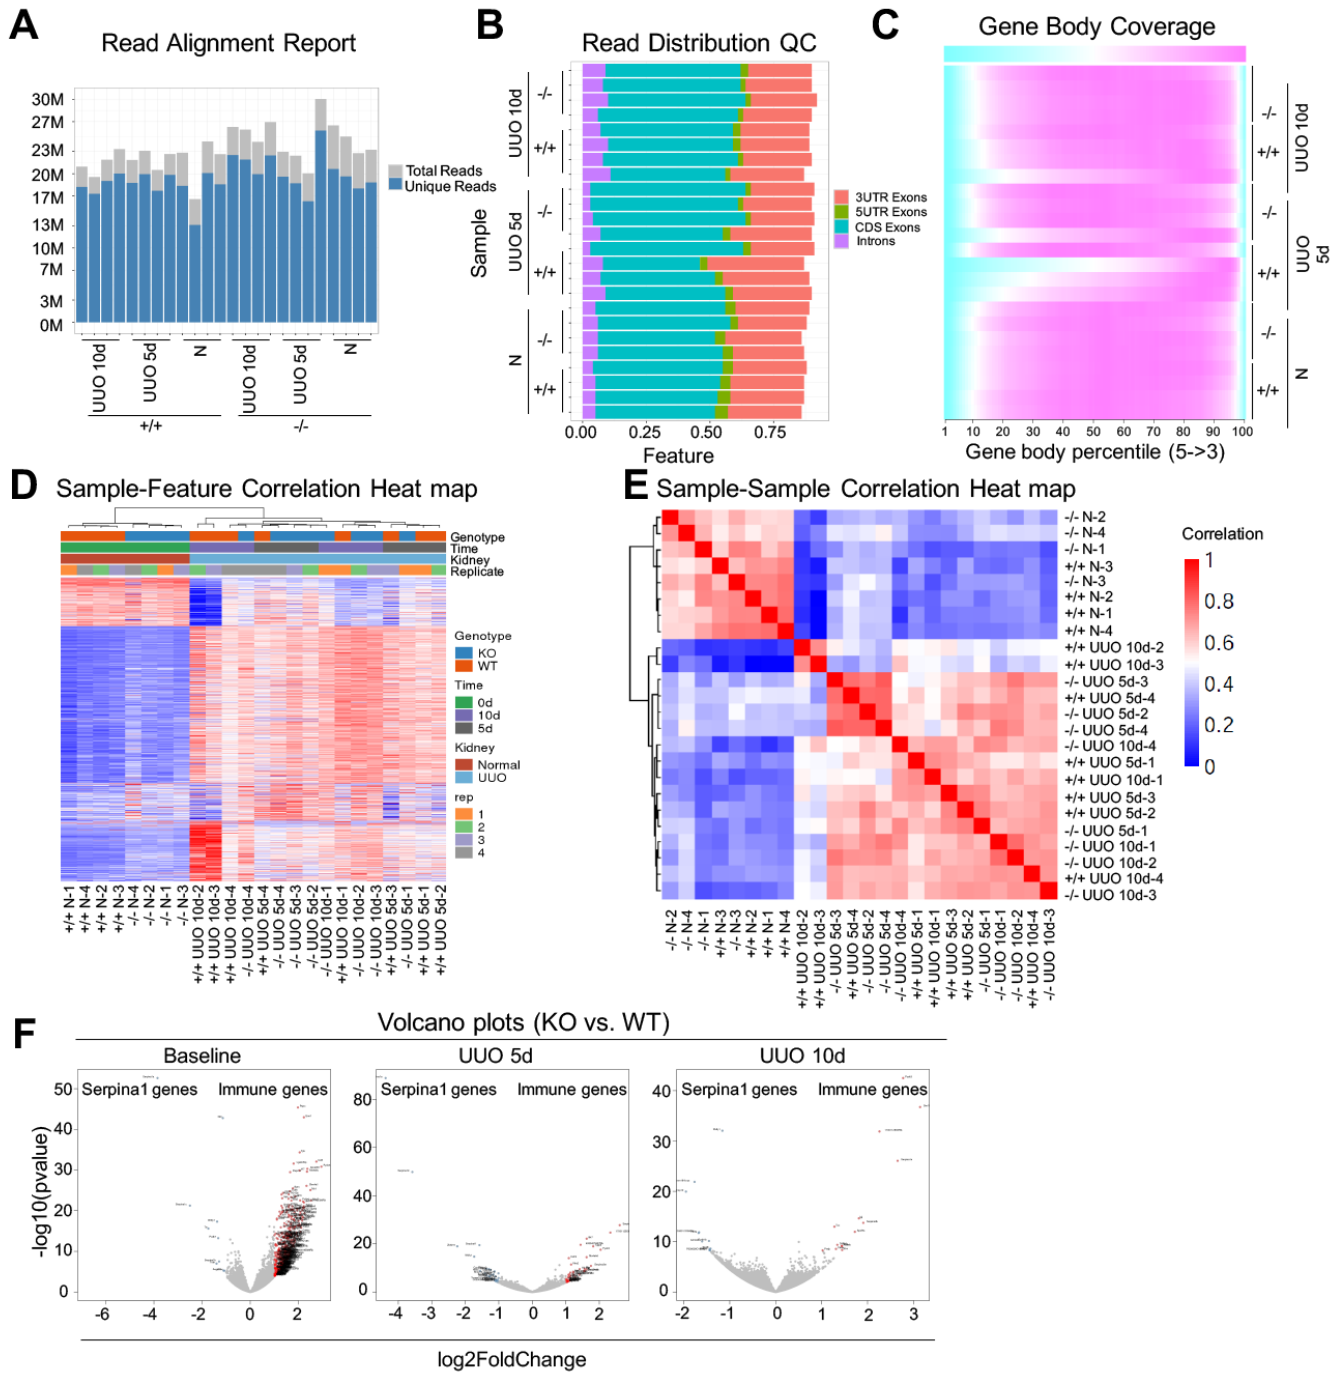

287

288

289 **Supplemental Figure 4.** RNA sequencing identifies differentially expressed genes between  
 290 the  $PLD4^{+/+}$  and  $PLD4^{-/-}$  mice. (A-D) RNA sequencing quality control. (E) Sample-sample  
 291 correlation heat map showing intra-group variation. (F) Volcano plots depicting the differentially

292 expressed immune (innate and adaptive) and serpin1 family genes between the PLD4<sup>+/+</sup> and  
293 PLD4<sup>-/-</sup> mice at baseline and following UUO (days 5 and 10) (n = 4/group).

294

295

296

297

298

299

300

301

302

303

304

305

306

307

308

309

310

311

312



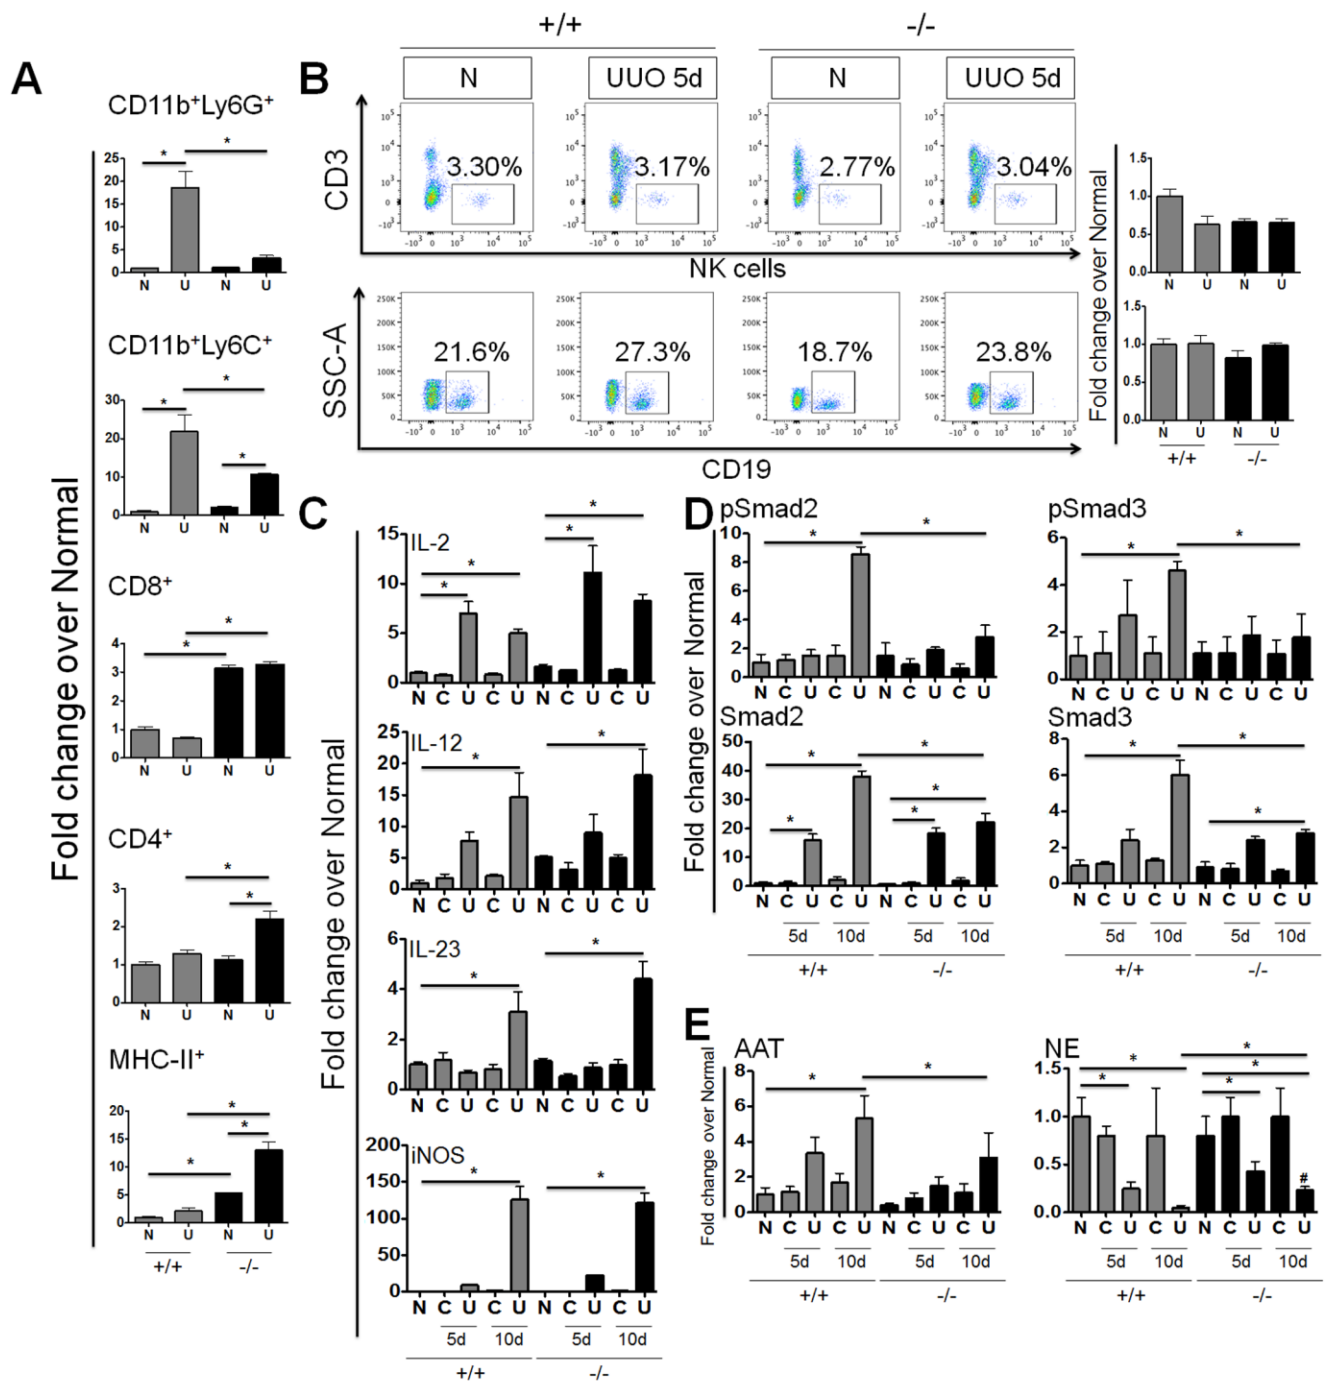

313

314

315 **Supplemental Figure 5.**  $PLD4^{-/-}$  mice kidneys show differential expression of innate and  
 316 adaptive immune components, decreased level of TGF- $\beta$  signaling molecules and AAT as well  
 317 as increased level of NE compared to the  $PLD4^{+/+}$  mice. (A) Quantification of the levels of

318 Cd11b<sup>+</sup>Ly6G<sup>+</sup>, Cd11b<sup>+</sup>Ly6C<sup>+</sup>, CD8<sup>+</sup>, CD4<sup>+</sup> and MHC-II<sup>+</sup> cells in the kidneys of mice at baseline  
319 and following UUO (day 5) (n = 3/group). (B) Flow cytometric analysis of NK cells and B cells  
320 in the kidneys of mice at baseline and following UUO (day 5) (n = 3/group). (C) mRNA levels of  
321 cytokines in the kidneys of mice at baseline and following UUO (days 5 and 10) (n = 5-  
322 7/group). Quantification of the protein expression of (D) TGF- $\beta$  signaling molecules, pSmad2,  
323 Smad2, pSmad3 and Smad3, and (E) AAT and NE in mice kidneys. Data were normalized to  
324 GAPDH and are presented as mean  $\pm$  SEM (n = 5-7/group) of the fold change over PLD4<sup>+/+</sup>  
325 Normal (N). \**P*<0.05. N-Normal, C-Contralateral, U-UUO.

326

327

328

329

330

331

332

333

334

335

336

337

338

339

340

341

342

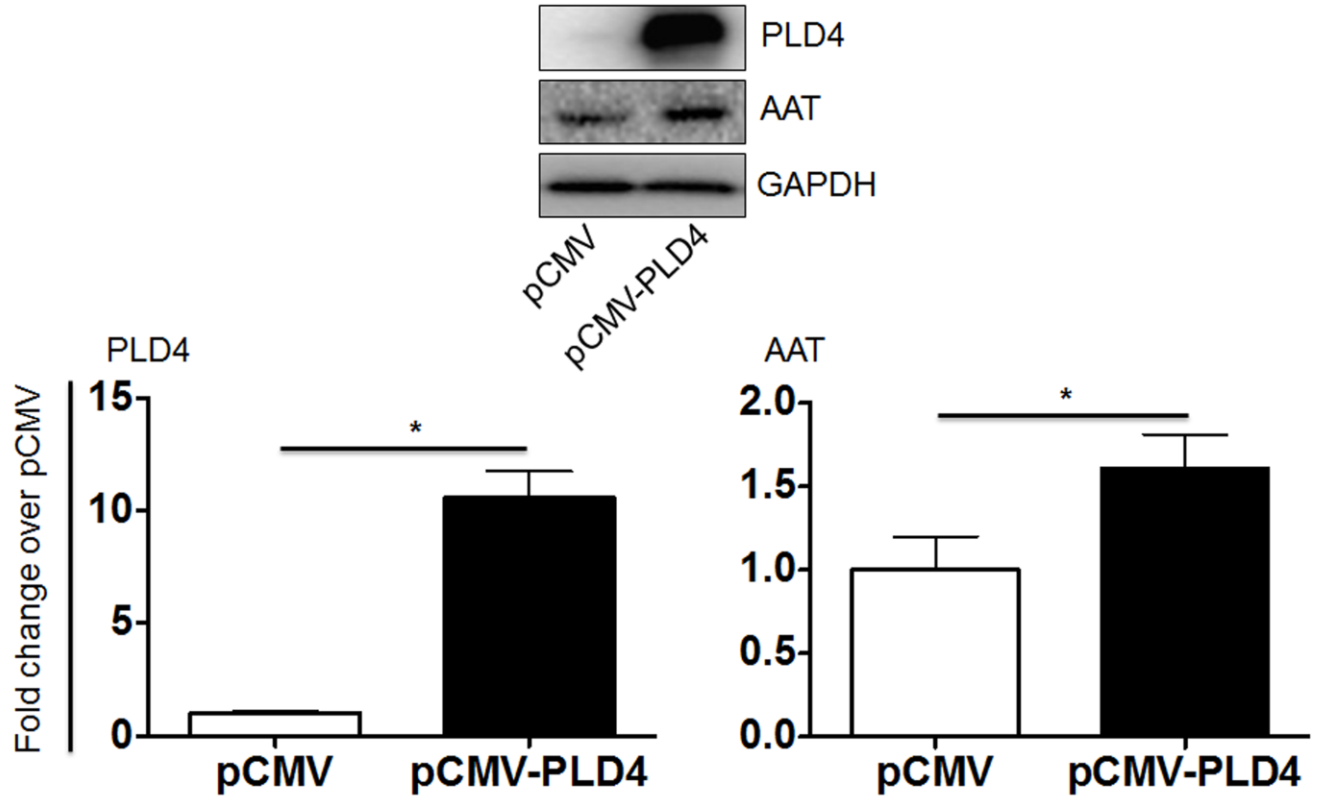

344

345

346

347

348

349

350

**Supplemental Figure 6.** PLD4-overexpressed HEK293T cells depict increased expression of

351

AAT. Protein expression of PLD4 and AAT in HEK293T cells transfected with pCMV or pCMV-

352

PLD4. Data were normalized to GAPDH and are presented as mean  $\pm$  SEM (n = 9 wells from

353

3 independent experiments) of the fold change over pCMV. \* $P < 0.05$ .

354

355

356

357

358

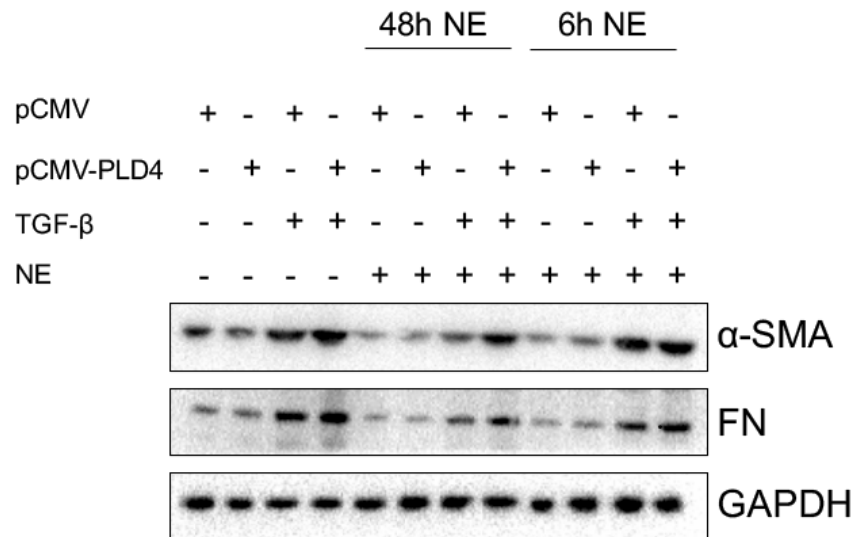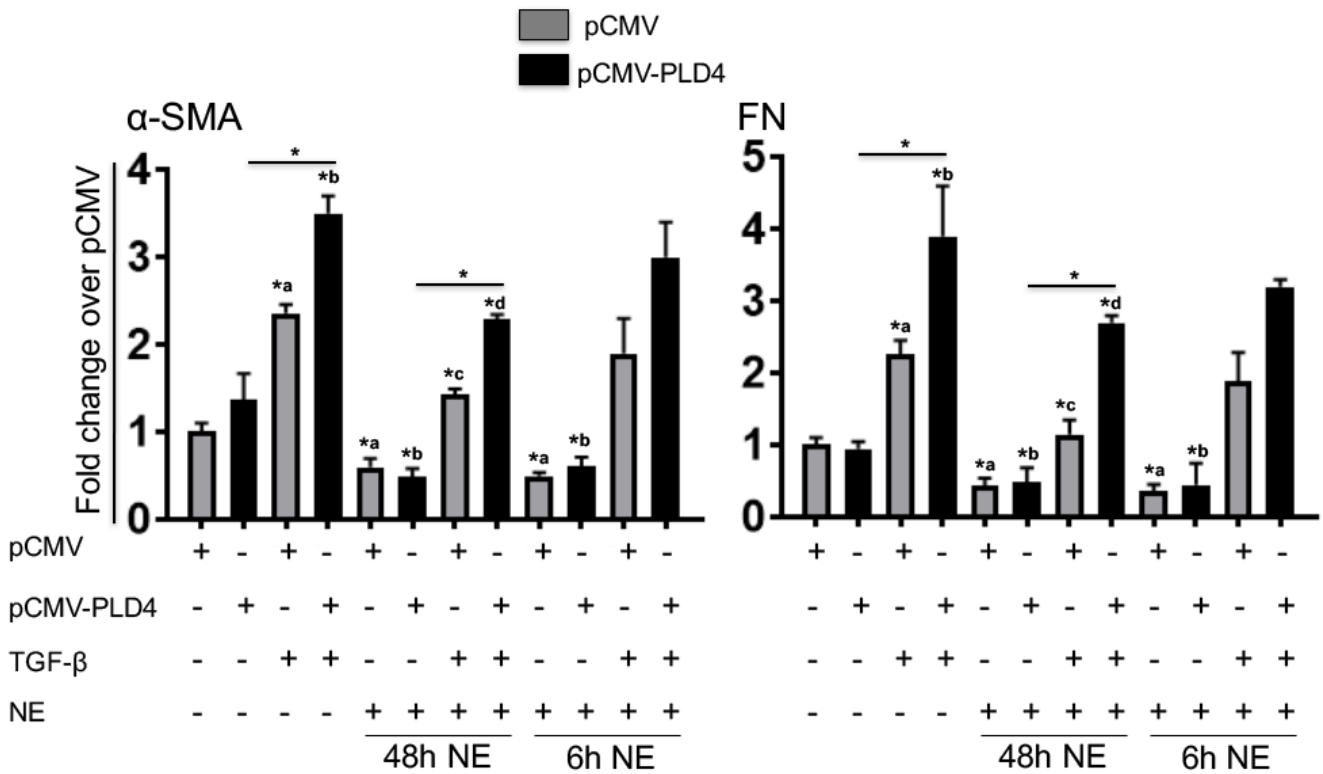

359

360 **Supplemental Figure 7.** PLD4-mediated increased expression of TGF- $\beta$ -induced fibrotic  
 361 markers is decreased with NE treatment in HEK293T cells and primary human kidney  
 362 fibroblasts co-culture system. Protein expression of  $\alpha$ -SMA and FN in primary human kidney  
 363 fibroblasts co-cultured with HEK293T cells (transfected with pCMV or pCMV-PLD4) treated

364 with TGF- $\beta$  (10ng/ml, 48h) and/or NE (50nM, 48h along with TGF- $\beta$  treatment or 6h after TGF-  
365  $\beta$  treatment). Data were normalized to GAPDH and are presented as mean  $\pm$  SEM (n=3  
366 indicates 3 independent experiments with each experiment having treated and control samples  
367 in 3 wells/group) of the fold change over pCMV. \* $P$ <0.05, \*<sup>a</sup> compared to pCMV, \*<sup>b</sup> compared  
368 to pCMV-PLD4, \*<sup>c</sup> compared to pCMV-TGF- $\beta$  treatment, \*<sup>d</sup> compared to pCMV-PLD4-TGF- $\beta$   
369 treatment.

370

371

372

373

374

375

376

377

378

379

380

381

382

383

384

385

386

387

388

389

390

**A** PLD4 siRNA-treated mIMCD3 cells

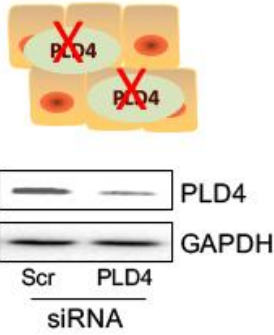

**B**

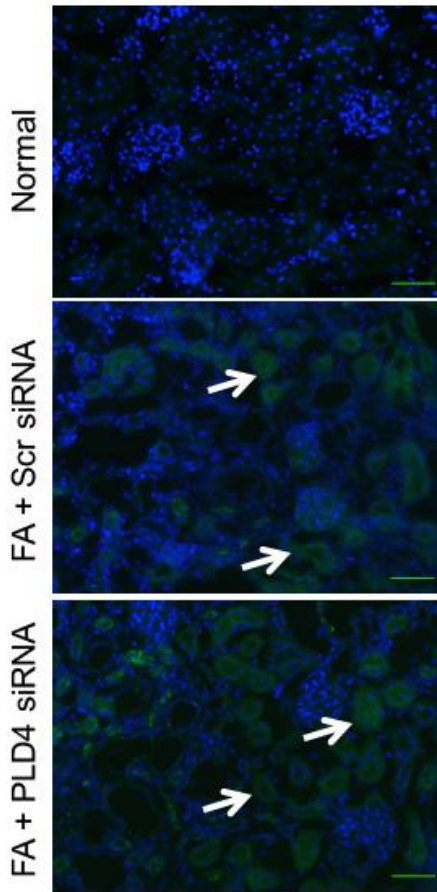

**C**

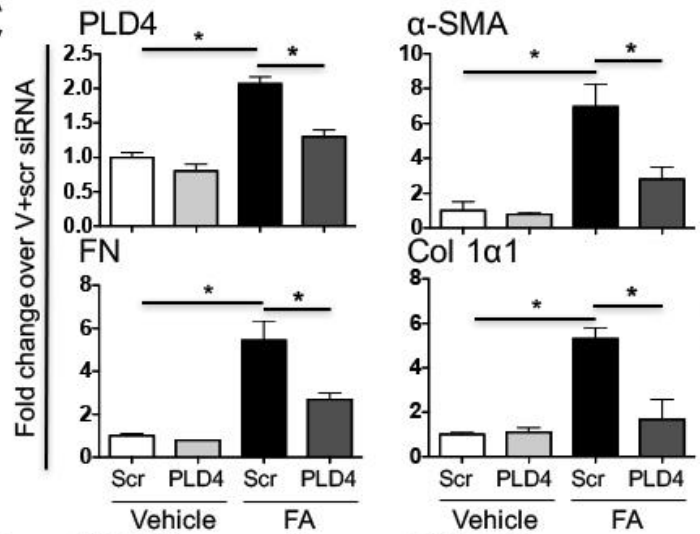

**D**

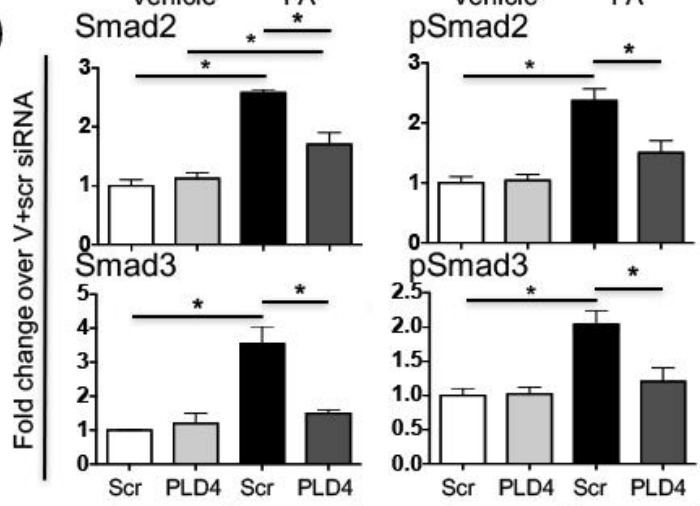

**E**

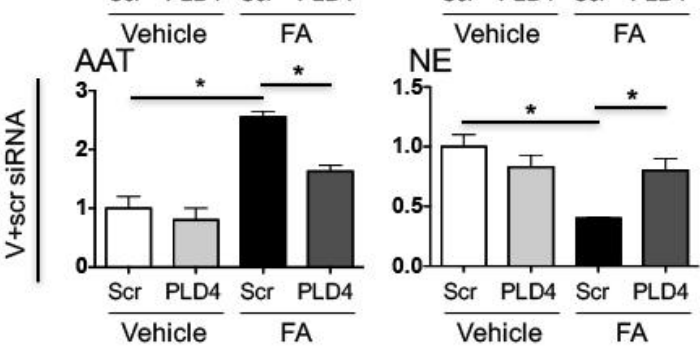

391

392 **Supplemental Figure 8.** Treatment with PLD4 siRNA protects mice from kidney fibrosis. (A)  
 393 PLD4 silencing in inner medullary collecting duct (mIMCD3) cells using siRNA. (B)  
 394 Photomicrographs depicting the delivery of siRNA (green, indicated with arrows) to the kidney  
 395 48h after the last dose of scrambled or PLD4 siRNA. (C) Quantification of the protein levels of  
 396 PLD4 and the fibrotic markers- $\alpha$ -SMA, fibronectin (FN) and collagen 1 $\alpha$ 1 (Col 1 $\alpha$ 1) in mice

397 kidneys. Quantification of the protein levels of (D) TGF- $\beta$  signaling molecules, pSmad2,  
398 Smad2, pSmad3 and Smad3, and (E) AAT and NE in mice kidneys. Data were normalized to  
399 GAPDH and are presented as mean  $\pm$  SEM (n = 5/group) of the fold change over Vehicle +  
400 scrambled siRNA. \* $P$ <0.05.

401

402

403

404

405

406

407

408

409

410

411

412

413

414

415

416

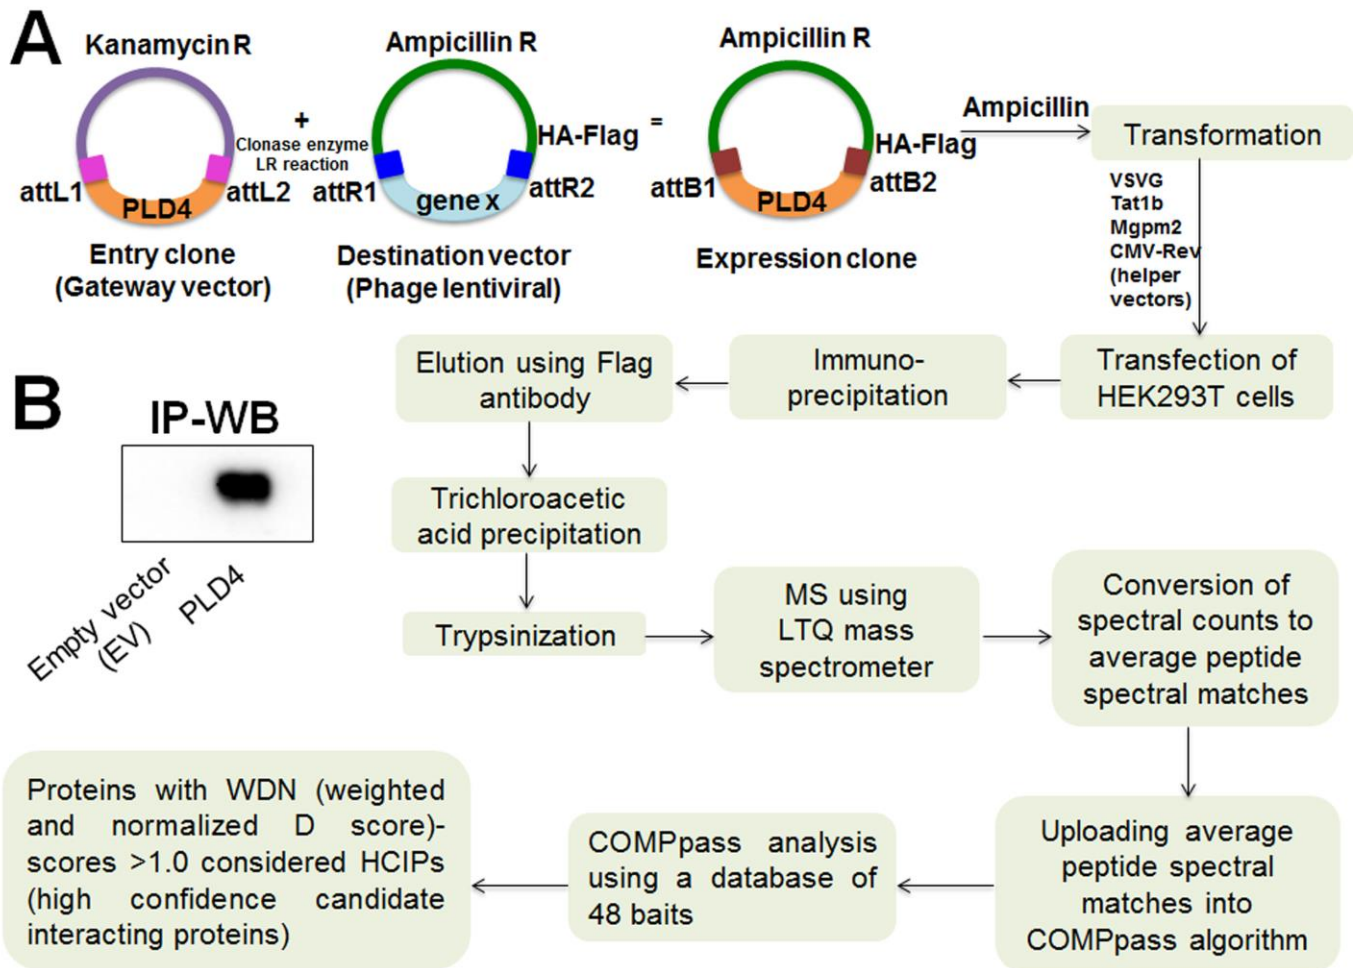

418

419

420 **Supplemental Figure 9.** Schematic illustration of the major steps involved in interaction  
 421 proteomics. (A) Overview of the immunoprecipitation/mass spectrometry (IP/MS) methodology  
 422 and (B) confirmation of the pull-down of PLD4 by Western blot.

423

424

425

426



427  
428  
429  
430  
431  
432  
433  
434  
435  
436  
437  
438  
439  
440  
441  
442  
443  
444  
445  
446  
447  
448  
449  
450  
451

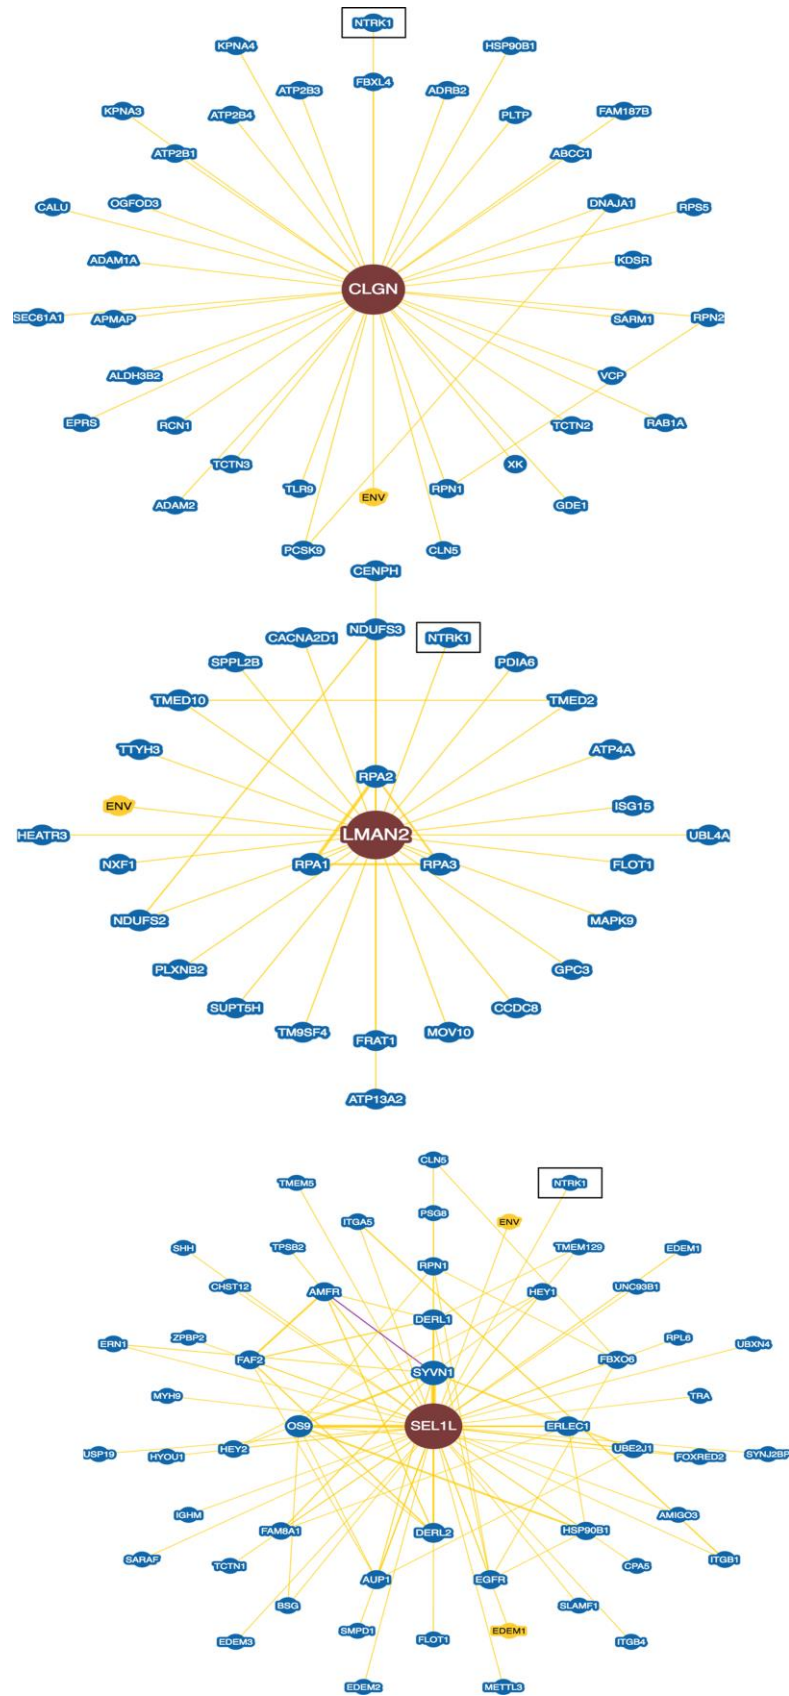

452

453 **Supplemental Figure 10.** Interaction network of the confirmed binding partners of PLD4  
454 (CLGN, LMAN2 and SEL1L). The interaction network shows Neurotrophic Receptor Tyrosine  
455 Kinase 1 (NTRK1), also known as Tropomyosin-Related Kinase A (TrkA) as a common  
456 interactor of CLGN, LMAN2 and SEL1L (<https://thebiogrid.org>).

457

458

459

460

461

462

463

464

465

466

467

468

469

470

471  
 472  
 473  
 474  
 475  
 476  
 477  
 478  
 479  
 480  
 481  
 482  
 483  
 484  
 485  
 486  
 487  
 488  
 489  
 490  
 491  
 492  
 493  
 494

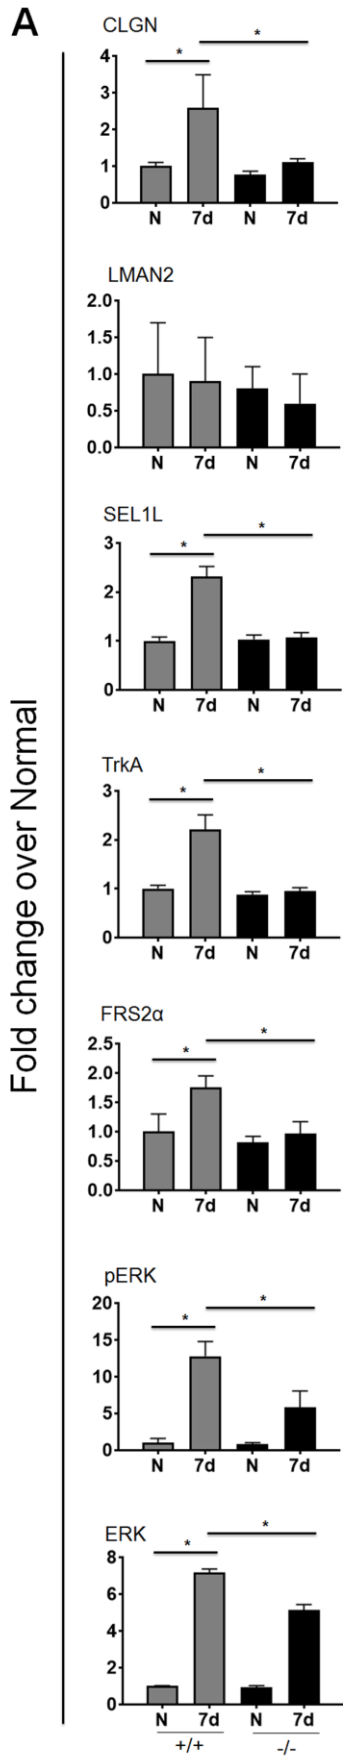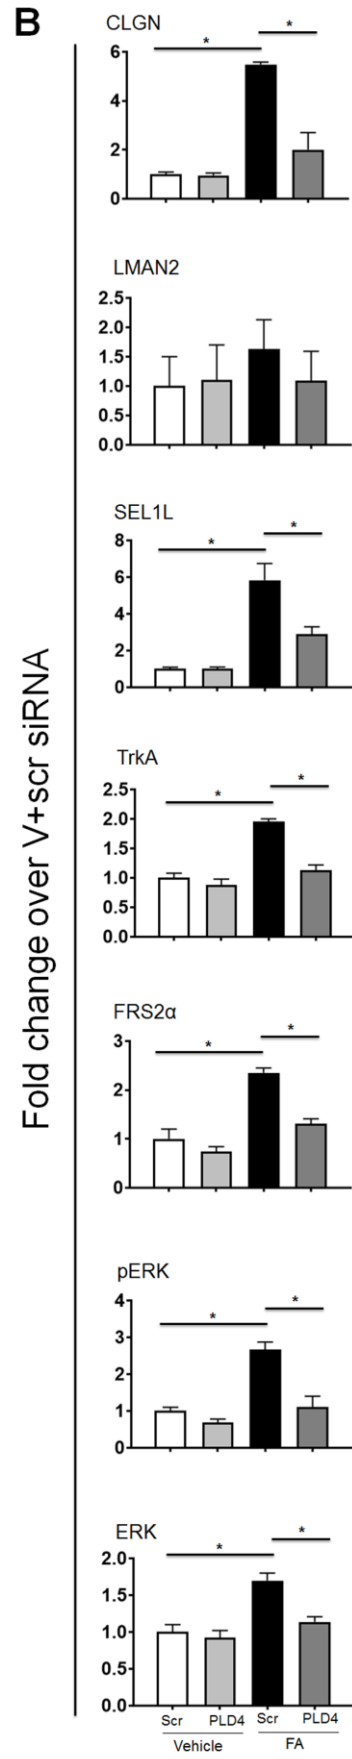

495

496 **Supplemental Figure 11.** PLD4 inhibition down-regulates TrkA-mediated MAPK signaling  
497 pathway. (A) Quantification of the protein levels of CLGN, LMAN2, SEL1L, TrkA, FRS2 $\alpha$ ,  
498 pERK and ERK in the kidneys of (A) PLD4<sup>+/+</sup> and PLD4<sup>-/-</sup> mice treated with FA and (B) mice  
499 treated with FA and/or siRNA (scr and/or PLD4). Data were normalized to GAPDH and are  
500 presented as mean  $\pm$  SEM (n = 5/group) of the fold change over PLD4<sup>+/+</sup> Normal (N) and  
501 Vehicle + scrambled siRNA, respectively. \**P*<0.05.

502

503

504

505

506

507

508

509

510

511

512

513

514

515

516

517

518

519

520

521 **REFERENCES**

- 522 1. Craciun FL, Ajay AK, Hoffmann D, Saikumar J, Fabian SL, Bijol V, Humphreys BD, Vaidya  
523 VS: Pharmacological and genetic depletion of fibrinogen protects from kidney fibrosis.  
524 *Am J Physiol Renal Physiol* 307: F471-484, 2014
- 525 2. Ajay AK, Kim TM, Ramirez-Gonzalez V, Park PJ, Frank DA, Vaidya VS: A bioinformatics  
526 approach identifies signal transducer and activator of transcription-3 and checkpoint  
527 kinase 1 as upstream regulators of kidney injury molecule-1 after kidney injury. *J Am*  
528 *Soc Nephrol* 25: 105-118, 2014
- 529 3. Cardenas-Gonzalez M, Osorio-Yanez C, Gaspar-Ramirez O, Pavkovic M, Ochoa-Martinez  
530 A, Lopez-Ventura D, Medeiros M, Barbier OC, Perez-Maldonado IN, Sabbisetti VS,  
531 Bonventre JV, Vaidya VS: Environmental exposure to arsenic and chromium in children  
532 is associated with kidney injury molecule-1. *Environ Res* 150: 653-662, 2016
- 533 4. Jadhav S, Ajay AK, Trivedi P, Seematti J, Pellegrini K, Craciun F, Vaidya VS: RNA-binding  
534 Protein Musashi Homologue 1 Regulates Kidney Fibrosis by Translational Inhibition of  
535 p21 and Numb mRNA. *J Biol Chem* 291: 14085-14094, 2016

536
